# Supplementary material for: Are antimicrobial defences in bird eggs related to climatic conditions associated with risk of trans-shell microbial infection?
Source: PubMed Central journal article supplement (PMC4107615; doi:10.1186/1742-9994-11-49), 2014-07-02

**Are antimicrobial defences in bird eggs related to climatic conditions associated with risk  
of trans-shell microbial infection?**

Nicholas P.C. Horrocks\*, Kathryn Hine, Arne Hegemann, Henry K. Ndithia, Mohammed Shobrak, Stéphane Ostrowski, Joseph B. Williams, Kevin D. Matson & B. Irene Tieleman

\*Author for correspondence: nh415@cam.ac.uk

**Additional file 3:**

A phylogenetic tree illustrating the relationships between the species examined in this study.

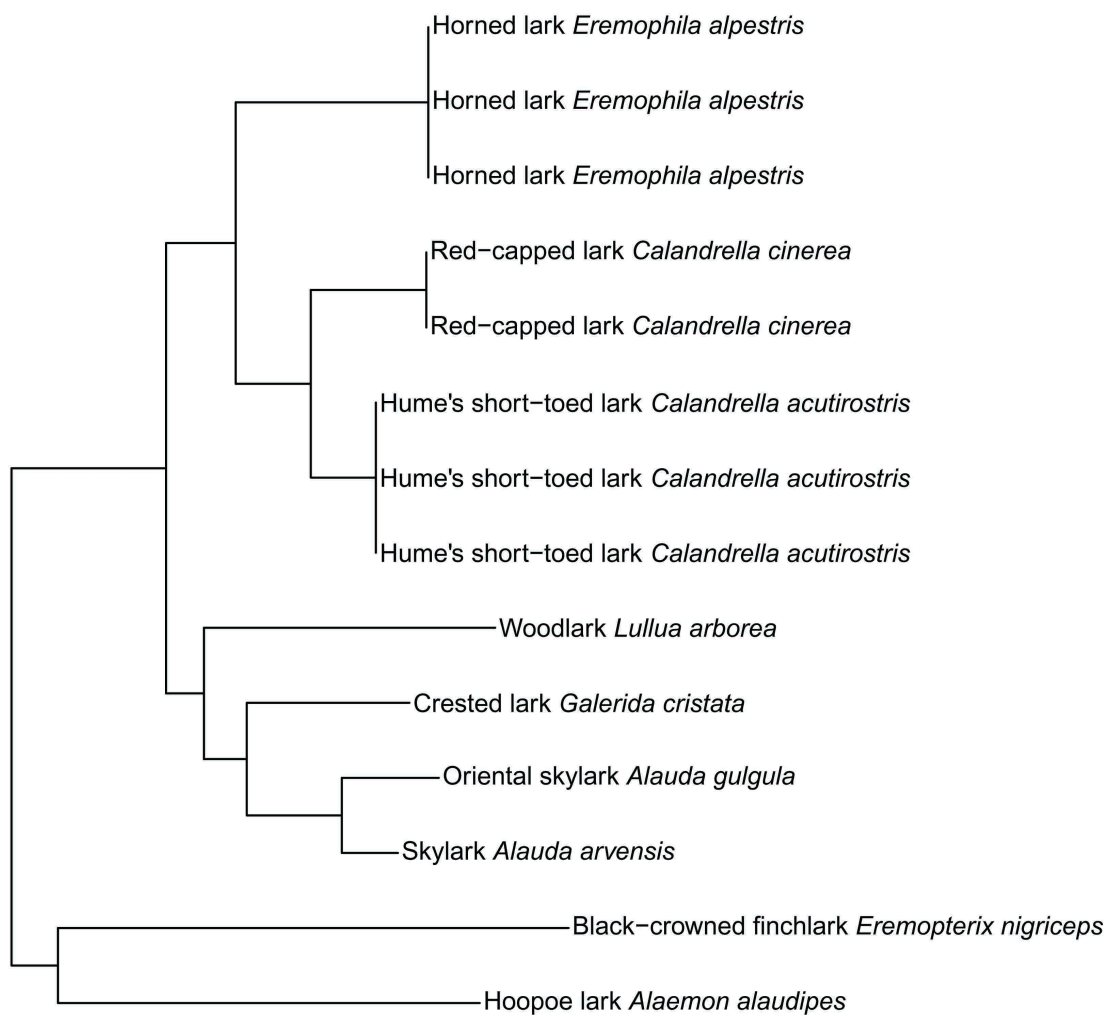

Supplement: 1742-9994-11-49-S3.pdf [file 1742-9994-11-49-S3.pdf]
